# Supplementary material
Source: PubMed Central journal article supplement (PMC3351088)
Supplement: NIHMS353536-supplement-01.pdf [file NIHMS353536-supplement-01.pdf]

321 **Appendix A. Supplementary Data**

322 *Gap Function*

323 The gap function represents the distance between the contacting surfaces  
 324  $\gamma^{(1)}$  and  $\gamma^{(2)}$ . Each surface  $\gamma^{(i)}$  ( $i = 1, 2$ ) is described by the position of  
 325 points on the surface,  $\mathbf{x}^{(i)}(\eta_{(i)}^1, \eta_{(i)}^2)$ , as a function of the given parametric  
 326 coordinates  $\eta_{(i)}^\alpha$  ( $\alpha = 1, 2$ ). Then, the covariant basis vectors on each surface  
 327 are

$$\mathbf{g}_\alpha^{(i)} = \frac{\partial \mathbf{x}^{(i)}}{\partial \eta_{(i)}^\alpha}, \quad \alpha = 1, 2. \quad (\text{A.1})$$

328 The unit outward normal on each surface is

$$\mathbf{n}^{(i)} = \frac{\mathbf{g}_1^{(i)} \times \mathbf{g}_2^{(i)}}{|\mathbf{g}_1^{(i)} \times \mathbf{g}_2^{(i)}|}. \quad (\text{A.2})$$

329 The gap function  $g$  is defined from

$$\mathbf{x}^{(2)} = \mathbf{x}^{(1)} + g\mathbf{n}^{(1)}, \quad g = (\mathbf{x}^{(2)} - \mathbf{x}^{(1)}) \cdot \mathbf{n}^{(1)}. \quad (\text{A.3})$$

330 *Directional Derivatives*

331 The directional derivatives of the position, effective pressure and effective  
 332 concentration, as well as equivalent virtual increments, are given by

$$\begin{aligned} D\mathbf{x}^{(1)} &= \Delta\mathbf{u}^{(1)}, & D\mathbf{x}^{(2)} &= \Delta\mathbf{u}^{(2)} + \mathbf{g}_\alpha^{(2)}\Delta\eta_{(2)}^\alpha \\ D\tilde{p}^{(1)} &= \Delta\tilde{p}^{(1)}, & D\tilde{p}^{(2)} &= \Delta\tilde{p}^{(2)} + \frac{\partial\tilde{p}^{(2)}}{\partial\eta_{(2)}^\alpha}\Delta\eta_{(2)}^\alpha \\ D\tilde{c}^{(1)} &= \Delta\tilde{c}^{(1)}, & D\tilde{c}^{(2)} &= \Delta\tilde{c}^{(2)} + \frac{\partial\tilde{c}^{(2)}}{\partial\eta_{(2)}^\alpha}\Delta\eta_{(2)}^\alpha \\ D\delta\mathbf{v}^{(1)} &= \mathbf{0}, & D\delta\mathbf{v}^{(2)} &= \frac{\partial\delta\mathbf{v}^{(2)}}{\partial\eta_{(2)}^\alpha}\Delta\eta_{(2)}^\alpha \\ D\delta\tilde{p}^{(1)} &= 0, & D\delta\tilde{p}^{(2)} &= \frac{\partial\delta\tilde{p}^{(2)}}{\partial\eta_{(2)}^\alpha}\Delta\eta_{(2)}^\alpha \\ D\delta\tilde{c}^{(1)} &= 0, & D\delta\tilde{c}^{(2)} &= \frac{\partial\delta\tilde{c}^{(2)}}{\partial\eta_{(2)}^\alpha}\Delta\eta_{(2)}^\alpha \end{aligned} \quad (\text{A.4})$$

333 In these expressions,

$$\Delta\eta_{(2)}^\alpha = (\Delta\mathbf{u}^{(1)} - \Delta\mathbf{u}^{(2)}) \cdot a^{\alpha\beta} \mathbf{g}_\beta^{(1)} - a^{\alpha\beta} g\mathbf{n}^{(1)} \cdot \frac{\partial\Delta\mathbf{u}^{(1)}}{\partial\eta_{(1)}^\beta}, \quad (\text{A.5})$$

334 where  $a^{\alpha\beta} = (A_{\alpha\beta})^{-1}$  and  $A_{\alpha\beta} = \mathbf{g}_\alpha^{(1)} \cdot \mathbf{g}_\beta^{(2)}$ . Similarly, it can be shown that

$$\begin{aligned} Dt_n &= \varepsilon_n (\Delta\mathbf{u}^{(2)} - \Delta\mathbf{u}^{(1)} + \mathbf{g}_\alpha^{(2)} \Delta\eta_{(2)}^\alpha) \cdot \mathbf{n}^{(1)} \\ Dw_n &= \varepsilon_p \left( \Delta\tilde{p}^{(1)} - \Delta\tilde{p}^{(2)} - \frac{\partial\tilde{p}^{(2)}}{\partial\eta_{(2)}^\alpha} \Delta\eta_{(2)}^\alpha \right) \\ Dj_n &= \varepsilon_c \left( \Delta\tilde{c}^{(1)} - \Delta\tilde{c}^{(2)} - \frac{\partial\tilde{c}^{(2)}}{\partial\eta_{(2)}^\alpha} \Delta\eta_{(2)}^\alpha \right) \end{aligned} \quad (\text{A.6})$$

335 Given these relations, the directional derivative of the various terms ap-  
336 pearing in the integrand of  $\delta G_c$  are

$$\begin{aligned} &D \left( t_n (\delta\mathbf{v}^{(1)} - \delta\mathbf{v}^{(2)}) \cdot \mathbf{g}_1^{(1)} \times \mathbf{g}_2^{(1)} \right) \\ &= -J_\eta^{(1)} \varepsilon_n (\delta\mathbf{v}^{(1)} - \delta\mathbf{v}^{(2)}) \cdot (\mathbf{n}^{(1)} \otimes \mathbf{n}^{(1)}) \cdot (\Delta\mathbf{u}^{(1)} - \Delta\mathbf{u}^{(2)}) \\ &+ J_\eta^{(1)} t_n \frac{\partial\delta\mathbf{v}^{(2)}}{\partial\eta_{(2)}^\alpha} \cdot (\mathbf{n}^{(2)} \otimes \mathbf{g}_2^\alpha) \cdot (\Delta\mathbf{u}^{(1)} - \Delta\mathbf{u}^{(2)}) \quad , \quad (\text{A.7}) \\ &+ t_n (\delta\mathbf{v}^{(1)} - \delta\mathbf{v}^{(2)}) \cdot \left( \frac{\partial\Delta\mathbf{u}^{(1)}}{\partial\eta_{(1)}^1} \times \mathbf{g}_2^{(1)} + \mathbf{g}_1^{(1)} \times \frac{\partial\Delta\mathbf{u}^{(1)}}{\partial\eta_{(1)}^2} \right) \end{aligned}$$

337

$$\begin{aligned} &D \left( w_n (\delta\tilde{p}^{(1)} - \delta\tilde{p}^{(2)}) \left| \mathbf{g}_1^{(1)} \times \mathbf{g}_2^{(1)} \right| \right) \\ &= J_\eta^{(1)} \varepsilon_p (\delta\tilde{p}^{(1)} - \delta\tilde{p}^{(2)}) (\Delta\tilde{p}^{(1)} - \Delta\tilde{p}^{(2)}) \\ &- J_\eta^{(1)} \left[ \varepsilon_p (\delta\tilde{p}^{(1)} - \delta\tilde{p}^{(2)}) \frac{\partial\tilde{p}^{(1)}}{\partial\eta_{(1)}^\alpha} \mathbf{g}_1^\alpha + w_n \frac{\partial\delta\tilde{p}^{(2)}}{\partial\eta_{(2)}^\alpha} \mathbf{g}_2^\alpha \right] \cdot (\Delta\mathbf{u}^{(1)} - \Delta\mathbf{u}^{(2)}) \quad , \\ &+ w_n (\delta\tilde{p}^{(1)} - \delta\tilde{p}^{(2)}) \mathbf{n}^{(1)} \cdot \left( \frac{\partial\Delta\mathbf{u}^{(1)}}{\partial\eta_{(1)}^1} \times \mathbf{g}_2^{(1)} + \mathbf{g}_1^{(1)} \times \frac{\partial\Delta\mathbf{u}^{(1)}}{\partial\eta_{(1)}^2} \right) \end{aligned} \quad (\text{A.8})$$

338 and

$$\begin{aligned}
& D \left( j_n (\delta\tilde{c}^{(1)} - \delta\tilde{c}^{(2)}) \left| \mathbf{g}_1^{(1)} \times \mathbf{g}_2^{(1)} \right| \right) \\
&= J_\eta^{(1)} \varepsilon_c (\delta\tilde{c}^{(1)} - \delta\tilde{c}^{(2)}) (\Delta\tilde{c}^{(1)} - \Delta\tilde{c}^{(2)}) \\
&- J_\eta^{(1)} \left[ \varepsilon_c (\delta\tilde{c}^{(1)} - \delta\tilde{c}^{(2)}) \frac{\partial\tilde{c}^{(1)}}{\partial\eta_{(1)}^\alpha} \mathbf{g}_{(1)}^\alpha + j_n \frac{\partial\delta\tilde{c}^{(2)}}{\partial\eta_{(2)}^\alpha} \mathbf{g}_{(2)}^\alpha \right] \cdot (\Delta\mathbf{u}^{(1)} - \Delta\mathbf{u}^{(2)}), \\
&+ j_n (\delta\tilde{c}^{(1)} - \delta\tilde{c}^{(2)}) \mathbf{n}^{(1)} \cdot \left( \frac{\partial\Delta\mathbf{u}^{(1)}}{\partial\eta_{(1)}^1} \times \mathbf{g}_2^{(1)} + \mathbf{g}_1^{(1)} \times \frac{\partial\Delta\mathbf{u}^{(1)}}{\partial\eta_{(1)}^2} \right)
\end{aligned} \tag{A.9}$$

339 where

$$J_\eta^{(1)} = \left| \mathbf{g}_1^{(1)} \times \mathbf{g}_2^{(1)} \right|. \tag{A.10}$$

340 *Discretization*

341 The contact integral may be discretized as

$$\begin{aligned}
\delta G_c = & \sum_{e=1}^{n_e^{(1)}} \sum_{k=1}^{n_{\text{int}}^{(e)}} W_k J_\eta^{(1)} \left[ t_n (\delta\mathbf{v}^{(1)} - \delta\mathbf{v}^{(2)}) \cdot \mathbf{n}^{(1)} \right. \\
& \left. + w_n (\delta\tilde{p}^{(1)} - \delta\tilde{p}^{(2)}) + j_n (\delta\tilde{c}^{(1)} - \delta\tilde{c}^{(2)}) \right],
\end{aligned} \tag{A.11}$$

342 where  $n_e^{(1)}$  is the number of element faces on  $\gamma^{(1)}$ ,  $n_{\text{int}}^{(e)}$  is the number of inte-  
343 gration points on the  $e$ -th element face of  $\gamma^{(1)}$ ,  $W_k$  is the weight associated  
344 with the  $k$ -th integration point. In this expression it should be understood  
345 that terms associated with  $\gamma^{(1)}$  (such as  $J_\eta^{(1)}$ ,  $\delta\mathbf{v}^{(1)}$ ,  $t_n$ , etc.) are evaluated  
346 at the parametric coordinates  $(\eta_{(1)}^1, \eta_{(1)}^2)$  of the  $k$ -th integration point  $\mathbf{x}^{(1)}$   
347 on  $\gamma^{(1)}$ , whereas terms associated with  $\gamma^{(2)}$  (such as  $\delta\mathbf{v}^{(2)}$ ,  $\delta\tilde{p}^{(2)}$ , etc.) are  
348 evaluated at the parametric coordinates  $(\eta_{(2)}^1, \eta_{(2)}^2)$  of the point  $\mathbf{x}^{(2)}$  on  $\gamma^{(2)}$   
349 closest to that integration point on  $\gamma^{(1)}$ , in accordance with (A.3).

350

The variables may be interpolated over each element face according to

$$\begin{aligned}
\delta \mathbf{v}^{(1)} &= \sum_{a=1}^{m^{(1)}} N_a^{(1)} \delta \mathbf{v}_a^{(1)} & \delta \mathbf{v}^{(2)} &= \sum_{b=1}^{m^{(2)}} N_b^{(2)} \delta \mathbf{v}_b^{(2)} \\
\Delta \mathbf{u}^{(1)} &= \sum_{c=1}^{m^{(1)}} N_c^{(1)} \Delta \mathbf{u}_c^{(1)} & \Delta \mathbf{u}^{(2)} &= \sum_{d=1}^{m^{(2)}} N_d^{(2)} \Delta \mathbf{u}_d^{(2)} \\
\delta \tilde{p}^{(1)} &= \sum_{a=1}^{m^{(1)}} N_a^{(1)} \delta \tilde{p}_a^{(1)} & \delta \tilde{p}^{(2)} &= \sum_{b=1}^{m^{(2)}} N_b^{(2)} \delta \tilde{p}_b^{(2)} \\
\Delta \tilde{p}^{(1)} &= \sum_{c=1}^{m^{(1)}} N_c^{(1)} \Delta \tilde{p}_c^{(1)} & \Delta \tilde{p}^{(2)} &= \sum_{d=1}^{m^{(2)}} N_d^{(2)} \Delta \tilde{p}_d^{(2)} \\
\delta \tilde{c}^{(1)} &= \sum_{a=1}^{m^{(1)}} N_a^{(1)} \delta \tilde{c}_a^{(1)} & \delta \tilde{c}^{(2)} &= \sum_{b=1}^{m^{(2)}} N_b^{(2)} \delta \tilde{c}_b^{(2)} \\
\Delta \tilde{c}^{(1)} &= \sum_{c=1}^{m^{(1)}} N_c^{(1)} \Delta \tilde{c}_c^{(1)} & \Delta \tilde{c}^{(2)} &= \sum_{d=1}^{m^{(2)}} N_d^{(2)} \Delta \tilde{c}_d^{(2)}
\end{aligned} \tag{A.12}$$

351 where  $N_a^{(i)} \left( \eta_{(i)}^1, \eta_{(i)}^2 \right)$  are the shape functions of element faces on  $\gamma^{(i)}$  and  
352  $m^{(i)}$  is the number of nodes on an element face. Then

$$\begin{aligned}
\delta G_c &= \sum_{e=1}^{n_e^{(1)}} \sum_{k=1}^{n_{\text{int}}^{(e)}} W_k J_\eta^{(1)} \left( \sum_{a=1}^{m^{(1)}} \left[ \delta \mathbf{v}_a^{(1)} \quad \delta \tilde{p}_a^{(1)} \quad \delta \tilde{c}_a^{(1)} \right] \cdot \begin{bmatrix} \mathbf{f}_a^{(1)} \\ w_a^{(1)} \\ j_a^{(1)} \end{bmatrix} \right) \\
&+ \sum_{b=1}^{m_k^{(2)}} \left[ \delta \mathbf{v}_{b,k}^{(1)} \quad \delta \tilde{p}_{b,k}^{(1)} \quad \delta \tilde{c}_{b,k}^{(1)} \right] \cdot \begin{bmatrix} \mathbf{f}_{b,k}^{(1)} \\ w_{b,k}^{(1)} \\ j_{b,k}^{(1)} \end{bmatrix}
\end{aligned} \tag{A.13}$$

353 where

$$\begin{aligned}
\mathbf{f}_a^{(1)} &= N_a^{(1)} t_n \mathbf{n}^{(1)} & \mathbf{f}_{b,k}^{(2)} &= -N_b^{(2)} t_n \mathbf{n}^{(1)} \\
w_a^{(1)} &= N_a^{(1)} w_n & w_{b,k}^{(2)} &= -N_b^{(2)} w_n \\
j_a^{(1)} &= N_a^{(1)} j_n & j_{b,k}^{(2)} &= -N_b^{(2)} j_n
\end{aligned} \tag{A.14}$$

354 Similarly,

$$\begin{aligned}
-D\delta G_c &= \sum_{e=1}^{n_e^{(1)}} \sum_{k=1}^{n_{\text{int}}^{(e)}} W_k J_\eta^{(1)} \\
&\times \left( \sum_{a=1}^{m^{(1)}} \left[ \delta \mathbf{v}_a^{(1)} \quad \delta \tilde{p}_a^{(1)} \quad \delta \tilde{c}_a^{(1)} \right] \cdot \right. \\
&\left( \sum_{c=1}^{m^{(1)}} \begin{bmatrix} \mathbf{K}_{ac}^{(1,1)} & \mathbf{0} & \mathbf{0} \\ \mathbf{g}_{ac}^{(1,1)} & g_{ac}^{(1,1)} & 0 \\ \mathbf{h}_{ac}^{(1,1)} & 0 & h_{ac}^{(1,1)} \end{bmatrix} \cdot \begin{bmatrix} \Delta \mathbf{u}_c^{(1)} \\ \Delta \tilde{p}_c^{(1)} \\ \Delta \tilde{c}_c^{(1)} \end{bmatrix} \right. \\
&+ \left. \sum_{d=1}^{m_k^{(2)}} \begin{bmatrix} \mathbf{K}_{ad,k}^{(1,2)} & \mathbf{0} & \mathbf{0} \\ \mathbf{g}_{ad,k}^{(1,2)} & g_{ad,k}^{(1,2)} & 0 \\ \mathbf{h}_{ad,k}^{(1,2)} & 0 & h_{ad,k}^{(1,2)} \end{bmatrix} \cdot \begin{bmatrix} \Delta \mathbf{u}_d^{(2)} \\ \Delta \tilde{p}_d^{(2)} \\ \Delta \tilde{c}_d^{(2)} \end{bmatrix} \right) \Bigg), \quad (\text{A.15}) \\
&+ \sum_{b=1}^{m_k^{(2)}} \left[ \delta \mathbf{v}_{b,k}^{(2)} \quad \delta \tilde{p}_{b,k}^{(2)} \quad \delta \tilde{c}_{b,k}^{(2)} \right] \cdot \\
&\left( \sum_{c=1}^{m^{(1)}} \begin{bmatrix} \mathbf{K}_{bc,k}^{(2,1)} & \mathbf{0} & \mathbf{0} \\ \mathbf{g}_{bc,k}^{(2,1)} & g_{bc,k}^{(2,1)} & 0 \\ \mathbf{h}_{bc,k}^{(2,1)} & 0 & h_{bc,k}^{(2,1)} \end{bmatrix} \cdot \begin{bmatrix} \Delta \mathbf{u}_c^{(1)} \\ \Delta \tilde{p}_c^{(1)} \\ \Delta \tilde{c}_c^{(1)} \end{bmatrix} \right. \\
&+ \left. \sum_{d=1}^{m_k^{(2)}} \begin{bmatrix} \mathbf{K}_{bd,k}^{(2,2)} & \mathbf{0} & \mathbf{0} \\ \mathbf{g}_{bd,k}^{(2,2)} & g_{bd,k}^{(2,2)} & 0 \\ \mathbf{h}_{bd,k}^{(2,2)} & 0 & h_{bd,k}^{(2,2)} \end{bmatrix} \cdot \begin{bmatrix} \Delta \mathbf{u}_d^{(2)} \\ \Delta \tilde{p}_d^{(2)} \\ \Delta \tilde{c}_d^{(2)} \end{bmatrix} \right) \Bigg)
\end{aligned}$$

355 where

$$\begin{aligned}
\mathbf{K}_{ac}^{(1,1)} &= N_a^{(1)} \left( \varepsilon_n N_c^{(1)} \mathbf{N}^{(1)} + t_n \mathbf{A}_c^{(1)} \right) \\
\mathbf{K}_{ad,k}^{(1,2)} &= -\varepsilon_n N_a^{(1)} N_d^{(2)} \mathbf{N}^{(1)} \\
\mathbf{K}_{bc,k}^{(2,1)} &= -N_c^{(1)} \left( \varepsilon_n N_b^{(2)} \mathbf{N}^{(1)} + t_n \mathbf{M}_b^{(2)} \right) - t_n N_b^{(2)} \mathbf{A}_c^{(1)}, \quad (\text{A.16}) \\
\mathbf{K}_{bd,k}^{(2,2)} &= N_d^{(2)} \left( \varepsilon_n N_b^{(2)} \mathbf{N}^{(1)} + t_n \mathbf{M}_b^{(2)} \right)
\end{aligned}$$

356

$$\begin{aligned}
\mathbf{g}_{ac}^{(1,1)} &= N_a^{(1)} \left( \varepsilon_p N_c^{(1)} \mathbf{p}^{(1)} - w_n \mathbf{A}_c^{(1)} \cdot \mathbf{n}^{(1)} \right) \\
\mathbf{g}_{ad,k}^{(1,2)} &= -\varepsilon_p N_a^{(1)} N_d^{(2)} \mathbf{p}^{(1)} \\
\mathbf{g}_{bc,k}^{(2,1)} &= N_c^{(1)} \left( -\varepsilon_p N_b^{(2)} \mathbf{p}^{(1)} + w_n \mathbf{m}_b^{(2)} \right) + w_n N_b^{(2)} \mathbf{A}_c^{(1)} \cdot \mathbf{n}^{(1)}, \\
\mathbf{g}_{bd,k}^{(2,2)} &= N_d^{(2)} \left( \varepsilon_p N_b^{(2)} \mathbf{p}^{(1)} - w_n \mathbf{m}_b^{(2)} \right)
\end{aligned} \tag{A.17}$$

357

$$\begin{aligned}
g_{ac}^{(1,1)} &= -\varepsilon_p N_a^{(1)} N_c^{(1)} \\
g_{ad,k}^{(1,2)} &= \varepsilon_p N_a^{(1)} N_d^{(2)} \\
g_{bc,k}^{(2,1)} &= \varepsilon_p N_b^{(2)} N_c^{(1)}, \\
g_{bd,k}^{(2,2)} &= -\varepsilon_p N_b^{(2)} N_d^{(2)}
\end{aligned} \tag{A.18}$$

358

$$\begin{aligned}
\mathbf{h}_{ac}^{(1,1)} &= N_a^{(1)} \left( \varepsilon_c N_c^{(1)} \mathbf{q}^{(1)} - j_n \mathbf{A}_c^{(1)} \cdot \mathbf{n}^{(1)} \right) \\
\mathbf{h}_{ad,k}^{(1,2)} &= -\varepsilon_c N_a^{(1)} N_d^{(2)} \mathbf{q}^{(1)} \\
\mathbf{h}_{bc,k}^{(2,1)} &= N_c^{(1)} \left( -\varepsilon_c N_b^{(2)} \mathbf{q}^{(1)} + j_n \mathbf{m}_b^{(2)} \right) + j_n N_b^{(2)} \mathbf{A}_c^{(1)} \cdot \mathbf{n}^{(1)}, \\
\mathbf{h}_{bd,k}^{(2,2)} &= N_d^{(2)} \left( \varepsilon_c N_b^{(2)} \mathbf{q}^{(1)} - j_n \mathbf{m}_b^{(2)} \right)
\end{aligned} \tag{A.19}$$

359

$$\begin{aligned}
h_{ac}^{(1,1)} &= -\varepsilon_c N_a^{(1)} N_c^{(1)} \\
h_{ad,k}^{(1,2)} &= \varepsilon_c N_a^{(1)} N_d^{(2)} \\
h_{bc,k}^{(2,1)} &= \varepsilon_c N_b^{(2)} N_c^{(1)}, \\
h_{bd,k}^{(2,2)} &= -\varepsilon_c N_b^{(2)} N_d^{(2)}
\end{aligned} \tag{A.20}$$

360 and

$$\begin{aligned}
\mathbf{N}^{(1)} &= \mathbf{n}^{(1)} \otimes \mathbf{n}^{(1)} \\
\mathbf{A}_c^{(1)} &= \frac{1}{J_\eta^{(1)}} \mathcal{A} \left\{ \frac{\partial N_c^{(1)}}{\partial \eta_1^{(1)}} \mathbf{g}_2^{(1)} - \frac{\partial N_c^{(1)}}{\partial \eta_2^{(1)}} \mathbf{g}_1^{(1)} \right\} \\
\mathbf{M}_b^{(2)} &= \mathbf{n}^{(2)} \otimes \mathbf{m}_b^{(2)} \\
\mathbf{m}_b^{(2)} &= \frac{\partial N_b^{(2)}}{\partial \eta_{(2)}^\alpha} \mathbf{g}_{(2)}^\alpha \\
\mathbf{p}^{(1)} &= \frac{\partial \tilde{p}^{(1)}}{\partial \eta_{(1)}^\alpha} \mathbf{g}_{(1)}^\alpha \\
\mathbf{q}^{(1)} &= \frac{\partial \tilde{c}^{(1)}}{\partial \eta_{(1)}^\alpha} \mathbf{g}_{(1)}^\alpha
\end{aligned} \tag{A.21}$$

361 Note that the operator  $\mathcal{A}\{\mathbf{v}\}$  represents the skew-symmetric tensor whose  
362 dual vector is  $\mathbf{v}$ . These relations provide the contributions to the global finite  
363 element stiffness matrix and load vector resulting from the contact interface.

#### 364 Flux Relations

365 The solvent volumetric flux relative to the solid,  $\mathbf{w}$ , and the solute molar  
366 flux relative to the solid,  $\mathbf{j}$ , are related to the gradients of the effective fluid  
367 pressure and solute concentration via

$$\begin{aligned}
\mathbf{w} &= -\tilde{\mathbf{k}} \cdot \left( \text{grad } \tilde{p} + R\theta \frac{\tilde{\kappa}}{d_0} \mathbf{d} \cdot \text{grad } \tilde{c} \right) \\
\mathbf{j} &= \tilde{\kappa} \mathbf{d} \cdot \left( -\varphi^w \text{grad } \tilde{c} + \frac{\tilde{c}}{d_0} \mathbf{w} \right)
\end{aligned} \tag{A.22}$$

368 where

$$\begin{aligned}
\tilde{\mathbf{k}} &= \left[ \mathbf{k}^{-1} + \frac{R\theta \tilde{\kappa} \tilde{c}}{\varphi^w d_0} \left( \mathbf{I} - \frac{\mathbf{d}}{d_0} \right) \right]^{-1} \\
\varphi^w &= 1 - \frac{\varphi_r^s}{J}
\end{aligned} \tag{A.23}$$

369 and  $\varphi_r^s$  is the solid volume fraction in the reference configuration. In these  
370 expressions  $\mathbf{d}$  is the solute diffusivity tensor in the mixture,  $d_0$  is the solute  
371 diffusivity in free solution (no solid matrix), and  $\mathbf{k}$  is the hydraulic perme-  
372 ability tensor for the flow of pure solvent through the porous solid matrix;  
373  $\tilde{\mathbf{k}}$  is the hydraulic permeability of the solution (solvent+solute) through the  
374 porous matrix.

375 *Reduction to Classical Diffusion-Convection Relations*

376 The biphasic-solute equations summarized in (2.1)-(2.3) and (A.22) may  
 377 be reduced to the classical equations of diffusion-convection by assuming that  
 378 the solid deformation is static,  $\mathbf{v}^s = \mathbf{0}$ ; that the physico-chemical behavior of  
 379 dilute solutions is ideal and there is no volume exclusion of solute from the  
 380 pore space of the solid matrix,  $\tilde{\kappa} = 1$ ,  $\Phi = 1$ ; and that the solute diffusivity  
 381 in the porous medium is the same as in free solution,  $\mathbf{d} = d_0\mathbf{I}$ . In that case,  
 382  $\tilde{c} = c$ ,  $\tilde{p} = p - R\theta c$ , and the flux relations of (A.22) become

$$\begin{aligned}\mathbf{w} &= -\mathbf{k} \cdot \text{grad } p \\ \mathbf{j} &= -\varphi^w d_0 \text{grad } c + c\mathbf{w}\end{aligned}$$

383 Furthermore, (2.2)-(2.3) reduce to

$$\begin{aligned}\text{div } \mathbf{w} &= 0 \\ \varphi^w \frac{\partial c}{\partial t} - \varphi^w d_0 \text{lap } c + \mathbf{w} \cdot \text{grad } c &= 0\end{aligned}\tag{A.24}$$

384 where 'lap' is the laplacian operator. For pure diffusion, let  $\mathbf{w} = \mathbf{0}$ ; for  
 385 steady-state convection, let  $\partial c / \partial t = 0$ .
